# Supplementary material for: Machine Learning Models to Predict In-Hospital Mortality among Inpatients with COVID-19: Underestimation and Overestimation Bias Analysis in Subgroup Populations
Source: J Healthc Eng. 2022 Jun 23;2022:1644910. doi: 10.1155/2022/1644910 (PMC9226971; doi:10.1155/2022/1644910)
Supplement: Supplementary Materials — Supplement 1: detailed Tables S1–S14. Supplement 2: Figures S1–S3. [file 1644910.f1.zip]

Archive with 2 entries (2 files):
- 1644910.f1/supplement1 (1).pdf
- 1644910.f1/supplement2.pdf
