# Supplementary material for: Machine Learning Models to Predict In-Hospital Mortality among Inpatients with COVID-19: Underestimation and Overestimation Bias Analysis in Subgroup Populations
Source: J Healthc Eng. 2022 Jun 23;2022:1644910. doi: 10.1155/2022/1644910 (PMC9226971; doi:10.1155/2022/1644910)
Supplement: Supplementary Materials — Supplement 1: detailed Tables S1–S14. Supplement 2: Figures S1–S3. [file 1644910.f1.zip › 1644910.f1/supplement1 (1).pdf]

# Machine learning models to predict in-hospital mortality among inpatients with COVID-

## 19: Under-estimation and over-estimation bias analysis in subgroup populations

Table S1. The frequency of missing data

| Feature                       | Percentage<br>of missing |
|-------------------------------|--------------------------|
| Paresis                       | 3.8                      |
| Paralysis                     | 3.8                      |
| Skin Manifestations           | 3.8                      |
| Vomiting                      | 3.1                      |
| Chest Pain                    | 2.6                      |
| Dizziness                     | 2.6                      |
| Headache                      | 2.6                      |
| Abdominal Pain                | 2.0                      |
| Diarrhea                      | 1.9                      |
| Nausea                        | 1.9                      |
| Anorexia                      | 1.9                      |
| Gustatory Dysfunction         | 1.2                      |
| Convulsion                    | 1.2                      |
| Other Diseases(Comorbidities) | 1.2                      |
| Drug Abuse                    | 1.2                      |
| Olfactory Dysfunction         | 1.2                      |
| Sweating                      | 1.2                      |
| Asthma                        | 1.2                      |
| Constipation                  | 1.2                      |
| GI bleeding                   | 1.2                      |
| Other GI Signs                | 1.2                      |
| Blood Oxygen Saturation Level | 1.2                      |
| Smoke                         | 1.2                      |
| Mental disorder               | 1.2                      |
| Ocular Manifestations         | 1.1                      |
| Age                           | 0.9                      |
| ICU admission                 | 0.7                      |
| Intubation                    | 0.7                      |

Table S2. The models developed on the original dataset 1 and the feature set 1 (test data)

| Model               | Settings          | Dataset-<br>Feature set | Accuracy | Sensitivity | Specificity | Precision | F score | AUC   |
|---------------------|-------------------|-------------------------|----------|-------------|-------------|-----------|---------|-------|
| RF                  | Default           | 1-1                     | 84.62    | 0.728       | 0.869       | 0.513     | 0.602   | 0.87  |
| C5                  | Default           | 1-1                     | 90.41    | 0.506       | 0.980       | 0.827     | 0.628   | 0.762 |
| C5                  | Boosting          | 1-1                     | 90.41    | 0.506       | 0.980       | 0.827     | 0.628   | 0.762 |
| CHIAD               | Default           | 1-1                     | 90.41    | 0.506       | 0.980       | 0.827     | 0.628   | 0.896 |
| CHIAD               | Boosting          | 1-1                     | 90.41    | 0.506       | 0.980       | 0.827     | 0.628   | 0.896 |
| CHIAD<br>exhaustive | Default           | 1-1                     | 90.41    | 0.506       | 0.980       | 0.827     | 0.628   | 0.896 |
| CHIAD<br>exhaustive | Boosting          | 1-1                     | 90.09    | 0.554       | 0.967       | 0.761     | 0.641   | 0.891 |
| SVM                 | RBF<br>Default    | 1-1                     | 90.28    | 0.528       | 0.974       | 0.795     | 0.635   | 0.843 |
| Bayesian<br>network | Default           | 1-1                     | 90.46    | 0.555       | 0.971       | 0.785     | 0.650   | 0.899 |
| MLP *               | Default<br>1.8    | 1-1                     | 90.15    | 0.546       | 0.969       | 0.771     | 0.639   | 0.894 |
| MLP                 | 1.20              | 1-1                     | 90.38    | 0.520       | 0.977       | 0.810     | 0.633   | 0.891 |
| MLP                 | 1.10              | 1-1                     | 90.41    | 0.526       | 0.976       | 0.807     | 0.637   | 0.888 |
| MLP                 | 1.5               | 1-1                     | 90.38    | 0.504       | 0.980       | 0.826     | 0.626   | 0.877 |
| MLP                 | 2.10.10           | 1-1                     | 90.03    | 0.526       | 0.971       | 0.778     | 0.628   | 0.896 |
| MLP                 | 2.20.20           | 1-1                     | 90.41    | 0.530       | 0.975       | 0.803     | 0.639   | 0.886 |
| MLP                 | 2.8.8             | 1-1                     | 90.60    | 0.540       | 0.976       | 0.808     | 0.647   | 0.888 |
| MLP                 | 2.5.5             | 1-1                     | 90.31    | 0.554       | 0.970       | 0.776     | 0.646   | 0.901 |
| MLP                 | 1.8<br>Boosting   | 1-1                     | 89.00    | 0.556       | 0.954       | 0.695     | 0.618   | 0.844 |
| MLP                 | 1.15              | 1-1                     | 90.22    | 0.552       | 0.969       | 0.771     | 0.643   | 0.886 |
| MLP                 | 2.5.5<br>Boosting | 1-1                     | 90.63    | 0.536       | 0.977       | 0.815     | 0.647   | 0.904 |
| MLP                 | 2.15.15           | 1-1                     | 90.19    | 0.522       | 0.974       | 0.793     | 0.630   | 0.885 |

\* For MLPs, the default setting indicates the network structure suggested by the software. The numbers for MLP indicate the number of layers, the number of neurons in the hidden layer 1 and the number of neurons in the hidden layer 2.

Table S3. The models developed on the original dataset 1 and the feature set 2 (test data)

| Model               | Settings            | Dataset-<br>Feature set | Accuracy | Sensitivity | Specificity | Precision | F score | AUC   |
|---------------------|---------------------|-------------------------|----------|-------------|-------------|-----------|---------|-------|
| RF                  | Default             | 1-2                     | 84.52    | 0.775       | 0.859       | 0.513     | 0.617   | 0.9   |
| C5                  | Default             | 1-2                     | 89.83    | 0.550       | 0.965       | 0.747     | 0.634   | 0.757 |
| C5                  | Boosting            | 1-2                     | 90.70    | 0.564       | 0.973       | 0.799     | 0.662   | 0.901 |
| CHIAD               | Default             | 1-2                     | 90.76    | 0.540       | 0.978       | 0.826     | 0.653   | 0.909 |
| CHIAD               | Boosting            | 1-2                     | 89.96    | 0.564       | 0.963       | 0.746     | 0.642   | 0.881 |
| CHIAD<br>exhaustive | Default             | 1-2                     | 90.19    | 0.522       | 0.974       | 0.793     | 0.630   | 0.893 |
| CHIAD<br>exhaustive | Boosting            | 1-2                     | 90.19    | 0.522       | 0.974       | 0.793     | 0.630   | 0.893 |
| SVM                 | RBF<br>Default      | 1-2                     | 90.64    | 0.581       | 0.969       | 0.782     | 0.667   | 0.879 |
| Bayesian<br>network | Default             | 1-2                     | 91.12    | 0.647       | 0.962       | 0.764     | 0.701   | 0.914 |
| MLP*                | Default<br>1.11     | 1-2                     | 90.35    | 0.548       | 0.971       | 0.783     | 0.645   | 0.889 |
| MLP                 | 1.20                | 1-2                     | 90.25    | 0.522       | 0.975       | 0.798     | 0.631   | 0.881 |
| MLP                 | 1.10                | 1-2                     | 90.12    | 0.530       | 0.972       | 0.782     | 0.632   | 0.88  |
| MLP                 | 1.5                 | 1-2                     | 90.25    | 0.518       | 0.976       | 0.802     | 0.629   | 0.885 |
| MLP                 | 2.10.10             | 1-2                     | 90.55    | 0.534       | 0.977       | 0.815     | 0.646   | 0.901 |
| MLP                 | 2.20.20             | 1-2                     | 89.93    | 0.488       | 0.978       | 0.805     | 0.608   | 0.877 |
| MLP                 | 2.11.11             | 1-2                     | 90.44    | 0.546       | 0.973       | 0.791     | 0.646   | 0.894 |
| MLP                 | 2.5.5               | 1-2                     | 90.12    | 0.540       | 0.970       | 0.774     | 0.636   | 0.896 |
| MLP                 | 2.10.10<br>Boosting | 1-2                     | 88.87    | 0.570       | 0.949       | 0.682     | 0.621   | 0.871 |
| MLP                 | 1.15                | 1-2                     | 90.19    | 0.532       | 0.972       | 0.785     | 0.634   | 0.882 |
| MLP                 | 2.11.11<br>Boosting | 1-2                     | 88.14    | 0.540       | 0.946       | 0.657     | 0.593   | 0.863 |
| MLP                 | 2.15.15             | 1-2                     | 90.31    | 0.524       | 0.975       | 0.801     | 0.634   | 0.889 |

\* For MLPs, the default setting indicates the network structure suggested by the software. The numbers for MLP indicate the number of layers, the number of neurons in the hidden layer 1 and the number of neurons in the hidden layer 2.

Table S4. The models developed on the original dataset 1 and the feature set 3(test data)

| Model               | Settings         | Dataset-<br>Feature set | Accuracy | Sensitivity | Specificity | Precision | F score | AUC   |
|---------------------|------------------|-------------------------|----------|-------------|-------------|-----------|---------|-------|
| RF                  | Default          | 1-3                     | 85.17    | 0.746       | 0.872       | 0.525     | 0.617   | 0.882 |
| C5                  | Default          | 1-3                     | 90.57    | 0.542       | 0.975       | 0.804     | 0.648   | 0.835 |
| C5                  | Boosting         | 1-3                     | 90.70    | 0.538       | 0.977       | 0.818     | 0.649   | 0.885 |
| CHIAD               | Default          | 1-3                     | 90.41    | 0.506       | 0.980       | 0.827     | 0.628   | 0.896 |
| CHIAD               | Boosting         | 1-3                     | 90.41    | 0.506       | 0.980       | 0.827     | 0.628   | 0.896 |
| CHIAD<br>exhaustive | Default          | 1-3                     | 90.41    | 0.506       | 0.980       | 0.827     | 0.628   | 0.896 |
| CHIAD<br>exhaustive | Boosting         | 1-3                     | 90.09    | 0.554       | 0.967       | 0.761     | 0.641   | 0.891 |
| SVM                 | RBF<br>Default   | 1-3                     | 89.71    | 0.584       | 0.957       | 0.719     | 0.645   | 0.852 |
| Bayesian<br>network | Default          | 1-3                     | 90.90    | 0.586       | 0.970       | 0.789     | 0.673   | 0.893 |
| MLP*                | Default<br>1.12  | 1-3                     | 90.44    | 0.556       | 0.971       | 0.783     | 0.650   | 0.887 |
| MLP                 | 1.20             | 1-3                     | 90.31    | 0.550       | 0.970       | 0.779     | 0.645   | 0.891 |
| MLP                 | 1.10             | 1-3                     | 90.35    | 0.514       | 0.978       | 0.813     | 0.630   | 0.89  |
| MLP                 | 1.5              | 1-3                     | 90.19    | 0.550       | 0.969       | 0.770     | 0.642   | 0.889 |
| MLP                 | 2.10.10          | 1-3                     | 89.99    | 0.540       | 0.968       | 0.765     | 0.633   | 0.891 |
| MLP                 | 2.20.20          | 1-3                     | 90.51    | 0.536       | 0.975       | 0.805     | 0.643   | 0.899 |
| MLP                 | 2.12.12          | 1-3                     | 90.66    | 0.516       | 0.981       | 0.838     | 0.639   | 0.869 |
| MLP                 | 2.5.5            | 1-3                     | 90.41    | 0.528       | 0.976       | 0.805     | 0.638   | 0.891 |
| MLP                 | 1.12<br>Boosting | 1-3                     | 88.24    | 0.598       | 0.936       | 0.642     | 0.619   | 0.879 |
| MLP                 | 1.15             | 1-3                     | 90.47    | 0.524       | 0.977       | 0.814     | 0.637   | 0.869 |
| MLP                 | 1.10<br>Boosting | 1-3                     | 90.79    | 0.540       | 0.978       | 0.823     | 0.652   | 0.903 |
| MLP                 | 2.15.15          | 1-3                     | 90.51    | 0.536       | 0.975       | 0.805     | 0.643   | 0.87  |

\* For MLPs, the default setting indicates the network structure suggested by the software. The numbers for MLP indicate the number of layers, the number of neurons in the hidden layer 1 and the number of neurons in the hidden layer 2.

Table S5. The models developed on the original dataset 1 and the feature set 4 (test data)

| Model               | Settings         | Dataset-<br>Feature set | Accuracy | Sensitivity | Specificity | Precision | F score | AUC   |
|---------------------|------------------|-------------------------|----------|-------------|-------------|-----------|---------|-------|
| RF                  | Default          | 1-4                     | 86.60    | 0.728       | 0.892       | 0.563     | 0.635   | 0.874 |
| C5                  | Default          | 1-4                     | 90.47    | 0.522       | 0.978       | 0.816     | 0.637   | 0.761 |
| C5                  | Boosting         | 1-4                     | 90.60    | 0.574       | 0.969       | 0.780     | 0.661   | 0.886 |
| CHIAD               | Default          | 1-4                     | 90.41    | 0.506       | 0.980       | 0.827     | 0.628   | 0.896 |
| CHIAD               | Boosting         | 1-4                     | 89.64    | 0.524       | 0.967       | 0.753     | 0.618   | 0.894 |
| CHIAD<br>exhaustive | Default          | 1-4                     | 90.41    | 0.506       | 0.980       | 0.827     | 0.628   | 0.897 |
| CHIAD<br>exhaustive | Boosting         | 1-4                     | 90.41    | 0.506       | 0.980       | 0.827     | 0.628   | 0.897 |
| SVM                 | RBF<br>Default   | 1-4                     | 89.26    | 0.606       | 0.947       | 0.686     | 0.643   | 0.861 |
| Bayesian<br>network | Default          | 1-4                     | 90.64    | 0.578       | 0.969       | 0.778     | 0.664   | 0.889 |
| MLP*                | Default<br>1.12  | 1-4                     | 90.22    | 0.550       | 0.969       | 0.772     | 0.643   | 0.895 |
| MLP                 | 1.20             | 1-4                     | 90.06    | 0.496       | 0.978       | 0.808     | 0.615   | 0.872 |
| MLP                 | 1.10             | 1-4                     | 90.63    | 0.584       | 0.968       | 0.775     | 0.666   | 0.897 |
| MLP                 | 1.5              | 1-4                     | 90.44    | 0.520       | 0.978       | 0.815     | 0.635   | 0.887 |
| MLP                 | 2.10.10          | 1-4                     | 90.06    | 0.508       | 0.975       | 0.796     | 0.620   | 0.876 |
| MLP                 | 2.20.20          | 1-4                     | 90.47    | 0.522       | 0.978       | 0.816     | 0.637   | 0.883 |
| MLP                 | 2.12.12          | 1-4                     | 89.99    | 0.522       | 0.972       | 0.779     | 0.625   | 0.88  |
| MLP                 | 2.5.5            | 1-4                     | 90.19    | 0.530       | 0.973       | 0.786     | 0.633   | 0.89  |
| MLP                 | 1.10<br>Boosting | 1-4                     | 90.12    | 0.558       | 0.967       | 0.760     | 0.644   | 0.898 |
| MLP                 | 1.15             | 1-4                     | 90.47    | 0.536       | 0.975       | 0.802     | 0.643   | 0.895 |
| MLP                 | 1.15<br>Boosting | 1-4                     | 87.98    | 0.544       | 0.944       | 0.648     | 0.591   | 0.872 |
| MLP                 | 2.15.15          | 1-4                     | 90.12    | 0.484       | 0.981       | 0.826     | 0.610   | 0.869 |

\* For MLPs, the default setting indicates the network structure suggested by the software. The numbers for MLP indicate the number of layers, the number of neurons in the hidden layer 1 and the number of neurons in the hidden layer 2.

Table S6. The models developed on the dataset 2 and the feature set 1 (test data)

| Model               | Settings          | Dataset-<br>Feature set | Accuracy | Sensitivity | Specificity | Precision | F score | AUC   |
|---------------------|-------------------|-------------------------|----------|-------------|-------------|-----------|---------|-------|
| RF                  | Default           | 2-1                     | 85.26    | 0.852       | 0.853       | 0.762     | 0.804   | 0.923 |
| C5                  | Default           | 2-1                     | 85.33    | 0.792       | 0.887       | 0.794     | 0.793   | 0.909 |
| C5                  | Boosting          | 2-1                     | 85.99    | 0.772       | 0.908       | 0.822     | 0.797   | 0.926 |
| CHIAD               | Default           | 2-1                     | 84.11    | 0.765       | 0.883       | 0.783     | 0.774   | 0.915 |
| CHIAD               | Boosting          | 2-1                     | 83.80    | 0.772       | 0.875       | 0.772     | 0.772   | 0.913 |
| CHIAD<br>exhaustive | Default           | 2-1                     | 84.67    | 0.769       | 0.889       | 0.793     | 0.781   | 0.917 |
| CHIAD<br>exhaustive | Boosting          | 2-1                     | 84.51    | 0.764       | 0.889       | 0.792     | 0.778   | 0.914 |
| SVM                 | RBF<br>Default    | 2-1                     | 85.94    | 0.770       | 0.908       | 0.823     | 0.796   | 0.922 |
| Bayesian<br>network | Default           | 2-1                     | 84.36    | 0.739       | 0.901       | 0.805     | 0.771   | 0.917 |
| MLP*                | Default<br>1.6    | 2-1                     | 85.30    | 0.760       | 0.904       | 0.814     | 0.786   | 0.919 |
| MLP                 | 1.20              | 2-1                     | 84.81    | 0.724       | 0.916       | 0.827     | 0.772   | 0.915 |
| MLP                 | 1.10              | 2-1                     | 85.35    | 0.754       | 0.908       | 0.819     | 0.785   | 0.919 |
| MLP                 | 1.5               | 2-1                     | 85.66    | 0.747       | 0.917       | 0.832     | 0.787   | 0.92  |
| MLP                 | 2.10.10           | 2-1                     | 85.61    | 0.755       | 0.912       | 0.825     | 0.789   | 0.92  |
| MLP                 | 2.20.20           | 2-1                     | 85.33    | 0.752       | 0.909       | 0.820     | 0.785   | 0.916 |
| MLP                 | 2.6.6             | 2-1                     | 85.47    | 0.756       | 0.909       | 0.821     | 0.787   | 0.921 |
| MLP                 | 2.5.5             | 2-1                     | 85.70    | 0.760       | 0.911       | 0.824     | 0.791   | 0.92  |
| MLP                 | 1.5<br>Boosting   | 2-1                     | 85.54    | 0.756       | 0.910       | 0.823     | 0.788   | 0.92  |
| MLP                 | 1.15              | 2-1                     | 85.52    | 0.743       | 0.917       | 0.832     | 0.785   | 0.919 |
| MLP                 | 2.5.5<br>Boosting | 2-1                     | 85.21    | 0.760       | 0.903       | 0.811     | 0.785   | 0.921 |
| MLP                 | 2.15.15           | 2-1                     | 85.63    | 0.760       | 0.910       | 0.822     | 0.790   | 0.921 |

\* For MLPs, the default setting indicates the network structure suggested by the software. The numbers for MLP indicate the number of layers, the number of neurons in the hidden layer 1 and the number of neurons in the hidden layer 2.

Table S7. The models developed on the dataset 2 and the feature set 2 (test data)

| Model               | Settings         | Dataset-<br>Feature set | Accuracy | Sensitivity | Specificity | Precision | F score | AUC   |
|---------------------|------------------|-------------------------|----------|-------------|-------------|-----------|---------|-------|
| RF                  | Default          | 2-2                     | 85.99    | 0.839       | 0.872       | 0.793     | 0.815   | 0.911 |
| C5                  | Default          | 2-2                     | 85.11    | 0.794       | 0.883       | 0.793     | 0.793   | 0.894 |
| C5                  | Boosting         | 2-2                     | 86.68    | 0.785       | 0.915       | 0.843     | 0.813   | 0.927 |
| CHIAD               | Default          | 2-2                     | 83.94    | 0.658       | 0.945       | 0.875     | 0.751   | 0.907 |
| CHIAD               | Boosting         | 2-2                     | 83.59    | 0.724       | 0.899       | 0.801     | 0.760   | 0.901 |
| CHIAD<br>exhaustive | Default          | 2-2                     | 83.85    | 0.711       | 0.910       | 0.816     | 0.760   | 0.901 |
| CHIAD<br>exhaustive | Boosting         | 2-2                     | 83.50    | 0.724       | 0.898       | 0.799     | 0.759   | 0.898 |
| SVM                 | RBF<br>Default   | 2-2                     | 86.61    | 0.790       | 0.911       | 0.837     | 0.813   | 0.926 |
| Bayesian<br>network | Default          | 2-2                     | 84.79    | 0.727       | 0.918       | 0.838     | 0.779   | 0.912 |
| MLP*                | Default<br>1.11  | 2-2                     | 84.33    | 0.719       | 0.913       | 0.823     | 0.767   | 0.906 |
| MLP                 | 1.20             | 2-2                     | 84.92    | 0.724       | 0.919       | 0.835     | 0.775   | 0.908 |
| MLP                 | 1.10             | 2-2                     | 84.66    | 0.715       | 0.921       | 0.835     | 0.770   | 0.907 |
| MLP                 | 1.5              | 2-2                     | 84.47    | 0.715       | 0.918       | 0.830     | 0.768   | 0.905 |
| MLP                 | 2.10.10          | 2-2                     | 84.45    | 0.720       | 0.915       | 0.825     | 0.769   | 0.908 |
| MLP                 | 2.20.20          | 2-2                     | 84.66    | 0.708       | 0.924       | 0.840     | 0.769   | 0.905 |
| MLP                 | 2.11.11          | 2-2                     | 84.80    | 0.729       | 0.915       | 0.827     | 0.775   | 0.905 |
| MLP                 | 2.5.5            | 2-2                     | 83.85    | 0.714       | 0.908       | 0.814     | 0.761   | 0.898 |
| MLP                 | 1.10<br>Boosting | 2-2                     | 84.40    | 0.758       | 0.894       | 0.807     | 0.782   | 0.911 |
| MLP                 | 1.15             | 2-2                     | 84.33    | 0.720       | 0.912       | 0.822     | 0.768   | 0.906 |
| MLP                 | 1.20<br>Boosting | 2-2                     | 84.64    | 0.720       | 0.917       | 0.830     | 0.771   | 0.911 |
| MLP                 | 2.15.15          | 2-2                     | 84.99    | 0.710       | 0.928       | 0.848     | 0.773   | 0.904 |

\* For MLPs, the default setting indicates the network structure suggested by the software. The numbers for MLP indicate the number of layers, the number of neurons in the hidden layer 1 and the number of neurons in the hidden layer 2.

Table S8. The models developed on the dataset 2 and the feature set 3 (test data)

| Model               | Settings         | Dataset-<br>Feature set | Accuracy | Sensitivity | Specificity | Precision | F score | AUC   |
|---------------------|------------------|-------------------------|----------|-------------|-------------|-----------|---------|-------|
| RF                  | Default          | 2-3                     | 85.23    | 0.861       | 0.848       | 0.757     | 0.806   | 0.908 |
| C5                  | Default          | 2-3                     | 85.61    | 0.792       | 0.891       | 0.801     | 0.796   | 0.918 |
| C5                  | Boosting         | 2-3                     | 87.44    | 0.818       | 0.906       | 0.827     | 0.822   | 0.94  |
| CHIAD               | Default          | 2-3                     | 84.11    | 0.765       | 0.883       | 0.783     | 0.774   | 0.915 |
| CHIAD               | Boosting         | 2-3                     | 84.65    | 0.765       | 0.891       | 0.795     | 0.780   | 0.915 |
| CHIAD<br>exhaustive | Default          | 2-3                     | 84.67    | 0.769       | 0.889       | 0.793     | 0.781   | 0.917 |
| CHIAD<br>exhaustive | Boosting         | 2-3                     | 85.05    | 0.790       | 0.884       | 0.790     | 0.790   | 0.92  |
| SVM                 | RBF<br>Default   | 2-3                     | 87.59    | 0.827       | 0.903       | 0.824     | 0.826   | 0.938 |
| Bayesian<br>network | Default          | 2-3                     | 85.23    | 0.756       | 0.906       | 0.815     | 0.784   | 0.921 |
| MLP*                | Default<br>1.10  | 2-3                     | 85.38    | 0.770       | 0.900       | 0.809     | 0.789   | 0.923 |
| MLP                 | 1.20             | 2-3                     | 85.77    | 0.735       | 0.926       | 0.845     | 0.786   | 0.922 |
| MLP                 | 1.5              | 2-3                     | 85.82    | 0.763       | 0.911       | 0.825     | 0.793   | 0.919 |
| MLP                 | 2.10.10          | 2-3                     | 85.38    | 0.758       | 0.907       | 0.817     | 0.786   | 0.919 |
| MLP                 | 2.20.20          | 2-3                     | 85.70    | 0.780       | 0.900       | 0.811     | 0.795   | 0.922 |
| MLP                 | 2.5.5            | 2-3                     | 85.56    | 0.768       | 0.904       | 0.815     | 0.791   | 0.918 |
| MLP                 | 1.10<br>Boosting | 2-3                     | 85.82    | 0.775       | 0.904       | 0.817     | 0.795   | 0.920 |
| MLP                 | 1.15             | 2-3                     | 86.39    | 0.775       | 0.913       | 0.830     | 0.802   | 0.919 |
| MLP                 | 1.15<br>Boosting | 2-3                     | 84.15    | 0.788       | 0.871       | 0.771     | 0.779   | 0.915 |
| MLP                 | 2.15.15          | 2-3                     | 85.77    | 0.762       | 0.910       | 0.824     | 0.792   | 0.919 |

\* For MLPs, the default setting indicates the network structure suggested by the software. The numbers for MLP indicate the number of layers, the number of neurons in the hidden layer 1 and the number of neurons in the hidden layer 2.

Table S9. The models developed on the dataset 2 and the feature set 4 (test data)

| Model               | Settings         | Dataset-<br>Feature set | Accuracy | Sensitivity | Specificity | Precision | F score | AUC   |
|---------------------|------------------|-------------------------|----------|-------------|-------------|-----------|---------|-------|
| RF                  | Default          | 2-4                     | 87.86    | 0.857       | 0.891       | 0.815     | 0.836   | 0.931 |
| C5                  | Default          | 2-4                     | 85.86    | 0.789       | 0.898       | 0.813     | 0.801   | 0.905 |
| C5                  | Boosting         | 2-4                     | 87.88    | 0.799       | 0.924       | 0.855     | 0.826   | 0.938 |
| CHIAD               | Default          | 2-4                     | 83.70    | 0.671       | 0.930       | 0.844     | 0.748   | 0.904 |
| CHIAD               | Boosting         | 2-4                     | 83.72    | 0.716       | 0.906       | 0.810     | 0.760   | 0.904 |
| CHIAD<br>exhaustive | Default          | 2-4                     | 83.70    | 0.671       | 0.930       | 0.844     | 0.748   | 0.904 |
| CHIAD<br>exhaustive | Boosting         | 2-4                     | 83.68    | 0.705       | 0.911       | 0.817     | 0.757   | 0.901 |
| SVM                 | RBF<br>Default   | 2-4                     | 87.83    | 0.834       | 0.903       | 0.829     | 0.832   | 0.942 |
| Bayesian<br>network | Default          | 2-4                     | 83.70    | 0.714       | 0.906       | 0.811     | 0.759   | 0.904 |
| MLP*                | Default<br>1.11  | 2-4                     | 83.21    | 0.731       | 0.889       | 0.788     | 0.758   | 0.899 |
| MLP                 | 1.20             | 2-4                     | 82.64    | 0.684       | 0.907       | 0.805     | 0.739   | 0.888 |
| MLP                 | 1.10             | 2-4                     | 84.88    | 0.731       | 0.915       | 0.829     | 0.777   | 0.908 |
| MLP                 | 1.5              | 2-4                     | 83.51    | 0.693       | 0.915       | 0.821     | 0.752   | 0.894 |
| MLP                 | 2.10.10          | 2-4                     | 83.94    | 0.729       | 0.902       | 0.806     | 0.766   | 0.9   |
| MLP                 | 2.20.20          | 2-4                     | 83.49    | 0.707       | 0.907       | 0.810     | 0.755   | 0.897 |
| MLP                 | 2.11.11          | 2-4                     | 82-3     | 0.691       | 0.914       | 0.819     | 0.750   | 0.896 |
| MLP                 | 2.5.5            | 2-4                     | 84.48    | 0.738       | 0.905       | 0.814     | 0.774   | 0.908 |
| MLP                 | 1.10<br>Boosting | 2-4                     | 84.69    | 0.720       | 0.919       | 0.832     | 0.772   | 0.906 |
| MLP                 | 1.15             | 2-4                     | 84.55    | 0.719       | 0.917       | 0.829     | 0.770   | 0.908 |
| MLP                 | 1.15<br>Boosting | 2-4                     | 84.57    | 0.749       | 0.900       | 0.808     | 0.778   | 0.908 |
| MLP                 | 2.15.15          | 2-4                     | 83.70    | 0.697       | 0.916       | 0.823     | 0.755   | 0.901 |

\* For MLPs, the default setting indicates the network structure suggested by the software. The numbers for MLP indicate the number of layers, the number of neurons in the hidden layer 1 and the number of neurons in the hidden layer 2.

Table S10. The models developed on the dataset 3 and the feature set 1 (test data)

| Model                            | Settings          | Dataset-<br>Feature set | Accuracy | Sensitivity | Specificity | Precision | F score | AUC   |
|----------------------------------|-------------------|-------------------------|----------|-------------|-------------|-----------|---------|-------|
| RF <sup>†</sup>                  | Default           | 3-1                     | 86.12    | 0.841       | 0.882       | 0.876     | 0.858   | 0.923 |
| C5                               | Default           | 3-1                     | 85.41    | 0.866       | 0.843       | 0.845     | 0.855   | 0.925 |
| C5 <sup>†</sup>                  | Boosting          | 3-1                     | 89.28    | 0.913       | 0.873       | 0.877     | 0.895   | 0.952 |
| CHIAD                            | Default           | 3-1                     | 82.78    | 0.810       | 0.846       | 0.839     | 0.824   | 0.912 |
| CHIAD <sup>†</sup>               | Boosting          | 3-1                     | 83.12    | 0.808       | 0.855       | 0.847     | 0.827   | 0.914 |
| CHIAD<br>exhaustive              | Default           | 3-1                     | 82.78    | 0.810       | 0.846       | 0.839     | 0.824   | 0.912 |
| CHIAD<br>exhaustive              | Boosting          | 3-1                     | 82.73    | 0.796       | 0.858       | 0.848     | 0.821   | 0.912 |
| SVM <sup>†</sup>                 | RBF<br>Default    | 3-1                     | 85.33    | 0.852       | 0.854       | 0.853     | 0.853   | 0.927 |
| Bayesian<br>network <sup>†</sup> | Default           | 3-1                     | 81.99    | 0.797       | 0.843       | 0.835     | 0.815   | 0.909 |
| MLP*                             | Default<br>1.7    | 3-1                     | 82.93    | 0.803       | 0.855       | 0.847     | 0.824   | 0.915 |
| MLP                              | 1.20              | 3-1                     | 82.35    | 0.781       | 0.866       | 0.853     | 0.815   | 0.912 |
| MLP                              | 1.10              | 3-1                     | 82.59    | 0.783       | 0.868       | 0.855     | 0.818   | 0.915 |
| MLP                              | 1.5               | 3-1                     | 82.97    | 0.801       | 0.858       | 0.849     | 0.824   | 0.916 |
| MLP                              | 2.10.10           | 3-1                     | 82.59    | 0.787       | 0.865       | 0.853     | 0.819   | 0.915 |
| MLP                              | 2.20.20           | 3-1                     | 83.24    | 0.821       | 0.843       | 0.839     | 0.830   | 0.915 |
| MLP                              | 2.7.7             | 3-1                     | 82.78    | 0.791       | 0.864       | 0.853     | 0.821   | 0.913 |
| MLP                              | 2.5.5             | 3-1                     | 83.22    | 0.802       | 0.862       | 0.852     | 0.827   | 0.915 |
| MLP <sup>†</sup>                 | 1.5<br>Boosting   | 3-1                     | 83.07    | 0.799       | 0.862       | 0.852     | 0.825   | 0.916 |
| MLP                              | 1.15              | 3-1                     | 82.63    | 0.792       | 0.861       | 0.850     | 0.820   | 0.917 |
| MLP                              | 2.5.5<br>Boosting | 3-1                     | 82.86    | 0.802       | 0.855       | 0.847     | 0.823   | 0.919 |
| MLP                              | 2.15.15           | 3-1                     | 83.42    | 0.810       | 0.858       | 0.851     | 0.830   | 0.914 |
| Ensemble                         | -                 | 3-1                     | 86.10    | 0.799       | 0.924       | 0.914     | 0.853   | 0.954 |
| C5                               | Boosting          | 3-1                     | 89.28    | 0.913       | 0.873       | 0.877     | 0.895   | 0.952 |

\* For MLPs, the default setting indicates the network structure suggested by the software. The numbers for MLP indicate the number of layers, the number of neurons in the hidden layer 1 and the number of neurons in the hidden layer 2.

<sup>†</sup> These models were used to develop ensemble models.

Table S11. The models developed on the dataset 3 and the feature set 2 (test data)

| Model                            | Settings         | Dataset-<br>Feature set | Accuracy | Sensitivity | Specificity | Precision | F score | AUC   |
|----------------------------------|------------------|-------------------------|----------|-------------|-------------|-----------|---------|-------|
| RF <sup>†</sup>                  | Default          | 3-2                     | 85.11    | 0.841       | 0.862       | 0.863     | 0.852   | 0.907 |
| C5                               | Default          | 3-2                     | 85.85    | 0.886       | 0.831       | 0.839     | 0.862   | 0.926 |
| C5 <sup>†</sup>                  | Boosting         | 3-2                     | 91.18    | 0.942       | 0.880       | 0.891     | 0.916   | 0.96  |
| CHIAD                            | Default          | 3-2                     | 81.27    | 0.783       | 0.842       | 0.831     | 0.806   | 0.9   |
| CHIAD                            | Boosting         | 3-2                     | 81.59    | 0.806       | 0.826       | 0.821     | 0.813   | 0.899 |
| CHIAD<br>exhaustive              | Default          | 3-2                     | 81.27    | 0.783       | 0.842       | 0.831     | 0.806   | 0.9   |
| CHIAD<br>exhaustive <sup>†</sup> | Boosting         | 3-2                     | 82.29    | 0.816       | 0.830       | 0.832     | 0.824   | 0.906 |
| SVM <sup>†</sup>                 | RBF<br>Default   | 3-2                     | 86.34    | 0.866       | 0.861       | 0.866     | 0.866   | 0.932 |
| Bayesian<br>network <sup>†</sup> | Default          | 3-2                     | 82.15    | 0.792       | 0.852       | 0.848     | 0.819   | 0.906 |
| MLP*                             | Default<br>1.9   | 3-2                     | 82.11    | 0.782       | 0.860       | 0.847     | 0.813   | 0.908 |
| MLP                              | 1.20             | 3-2                     | 81.98    | 0.786       | 0.853       | 0.842     | 0.813   | 0.906 |
| MLP                              | 1.10             | 3-2                     | 82.00    | 0.782       | 0.857       | 0.845     | 0.812   | 0.906 |
| MLP                              | 1.5              | 3-2                     | 81.59    | 0.783       | 0.848       | 0.837     | 0.809   | 0.902 |
| MLP                              | 2.10.10          | 3-2                     | 82.24    | 0.799       | 0.845       | 0.837     | 0.818   | 0.909 |
| MLP                              | 2.20.20          | 3-2                     | 81.33    | 0.786       | 0.841       | 0.830     | 0.807   | 0.906 |
| MLP                              | 2.9.9            | 3-2                     | 82.24    | 0.794       | 0.850       | 0.840     | 0.817   | 0.905 |
| MLP                              | 2.5.5            | 3-2                     | 81.76    | 0.783       | 0.851       | 0.840     | 0.811   | 0.907 |
| MLP                              | 1.9<br>Boosting  | 3-2                     | 82.15    | 0.782       | 0.860       | 0.847     | 0.814   | 0.912 |
| MLP                              | 1.15             | 3-2                     | 81.70    | 0.768       | 0.866       | 0.850     | 0.807   | 0.903 |
| MLP <sup>†</sup>                 | 1.10<br>Boosting | 3-2                     | 83.48    | 0.811       | 0.860       | 0.857     | 0.833   | 0.913 |
| MLP                              | 1.15.15          | 3-2                     | 82.05    | 0.794       | 0.847       | 0.838     | 0.815   | 0.905 |
| Ensemble                         |                  | 3-2                     | 87.39    | 0.859       | 0.889       | 0.888     | 0.873   | 0.954 |

\* For MLPs, the default setting indicates the network structure suggested by the software. The numbers for MLP indicate the number of layers, the number of neurons in the hidden layer 1 and the number of neurons in the hidden layer 2.

<sup>†</sup> These models were used to develop ensemble models.

Table S12. The models developed on the dataset 3 and the feature set 3 (test data)

| Model                            | Settings            | Dataset-<br>Feature set | Accuracy | Sensitivity | Specificity | Precision | F score | AUC   |
|----------------------------------|---------------------|-------------------------|----------|-------------|-------------|-----------|---------|-------|
| RF <sup>†</sup>                  | Default             | 3-3                     | 86.43    | 0.850       | 0.880       | 0.879     | 0.864   | 0.917 |
| C5                               | Default             | 3-3                     | 87.40    | 0.898       | 0.850       | 0.861     | 0.879   | 0.934 |
| C5 <sup>†</sup>                  | Boosting            | 3-3                     | 91.74    | 0.936       | 0.898       | 0.905     | 0.920   | 0.965 |
| CHIAD                            | Default             | 3-3                     | 81.50    | 0.797       | 0.834       | 0.832     | 0.814   | 0.904 |
| CHIAD <sup>†</sup>               | Boosting            | 3-3                     | 83.16    | 0.823       | 0.840       | 0.842     | 0.833   | 0.911 |
| CHIAD<br>exhaustive              | Default             | 3-3                     | 81.59    | 0.803       | 0.830       | 0.830     | 0.816   | 0.905 |
| CHIAD<br>exhaustive              | Boosting            | 3-3                     | 83.12    | 0.813       | 0.850       | 0.849     | 0.830   | 0.911 |
| SVM <sup>†</sup>                 | RBF<br>Default      | 3-3                     | 88.81    | 0.905       | 0.871       | 0.879     | 0.892   | 0.944 |
| Bayesian<br>network <sup>†</sup> | Default             | 3-3                     | 82.91    | 0.802       | 0.858       | 0.853     | 0.827   | 0.91  |
| MLP*                             | Default<br>1.11     | 3-3                     | 83.58    | 0.825       | 0.847       | 0.848     | 0.836   | 0.915 |
| MLP                              | 1.20                | 3-3                     | 82.56    | 0.802       | 0.850       | 0.847     | 0.824   | 0.91  |
| MLP                              | 1.10                | 3-3                     | 82.97    | 0.787       | 0.874       | 0.866     | 0.824   | 0.911 |
| MLP                              | 1.5                 | 3-3                     | 83.47    | 0.811       | 0.859       | 0.856     | 0.833   | 0.912 |
| MLP                              | 2.10.10             | 3-3                     | 83.47    | 0.795       | 0.875       | 0.869     | 0.830   | 0.909 |
| MLP                              | 2.20.20             | 3-3                     | 82.52    | 0.785       | 0.867       | 0.859     | 0.820   | 0.901 |
| MLP                              | 2.11.11             | 3-3                     | 82.54    | 0.801       | 0.851       | 0.848     | 0.823   | 0.906 |
| MLP                              | 2.5.5               | 3-3                     | 83.79    | 0.820       | 0.856       | 0.855     | 0.837   | 0.912 |
| MLP                              | 2.5.5<br>Boosting   | 3-3                     | 84.20    | 0.828       | 0.857       | 0.857     | 0.842   | 0.918 |
| MLP                              | 1.15                | 3-3                     | 82-2     | 0.798       | 0.869       | 0.863     | 0.830   | 0.909 |
| MLP                              | 1.11<br>Boosting    | 3-3                     | 86.66    | 0.890       | 0.842       | 0.854     | 0.872   | 0.923 |
| MLP                              | 2.15.15             | 3-3                     | 83.77    | 0.805       | 0.872       | 0.866     | 0.835   | 0.913 |
| MLP <sup>†</sup>                 | 2.15.15<br>Boosting | 3-3                     | 88.59    | 0.902       | 0.869       | 0.877     | 0.889   | 0.94  |
| Ensemble                         |                     |                         | 87.26    | 0.831       | 0.915       | 0.908     | 0.867   | 0.954 |

\* For MLPs, the default setting indicates the network structure suggested by the software. The numbers for MLP indicate the number of layers, the number of neurons in the hidden layer 1 and the number of neurons in the hidden layer 2.

<sup>†</sup> These models were used to develop ensemble models.

Table S13. The models developed on the dataset 3 and the feature set 4 (test data)

| Model                            | Settings            | Dataset-<br>Feature set | Accuracy | Sensitivity | Specificity | Precision | F score | AUC   |
|----------------------------------|---------------------|-------------------------|----------|-------------|-------------|-----------|---------|-------|
| RF <sup>†</sup>                  | Default             | 3-4                     | 85.85    | 0.850       | 0.867       | 0.863     | 0.856   | 0.927 |
| C5                               | Default             | 3-4                     | 87.78    | 0.892       | 0.864       | 0.866     | 0.879   | 0.931 |
| C5 <sup>†</sup>                  | Boosting            | 3-4                     | 92.77    | 0.951       | 0.905       | 0.908     | 0.929   | 0.972 |
| CHIAD                            | Default             | 3-4                     | 83.10    | 0.806       | 0.855       | 0.846     | 0.826   | 0.909 |
| CHIAD                            | Boosting            | 3-4                     | 83.47    | 0.813       | 0.856       | 0.848     | 0.830   | 0.911 |
| CHIAD<br>exhaustive              | Default             | 3-4                     | 82.95    | 0.819       | 0.840       | 0.834     | 0.827   | 0.91  |
| CHIAD<br>exhaustive <sup>†</sup> | Boosting            | 3-4                     | 83.74    | 0.825       | 0.849       | 0.844     | 0.834   | 0.913 |
| SVM <sup>†</sup>                 | RBF<br>Default      | 3-4                     | 90.16    | 0.927       | 0.877       | 0.881     | 0.903   | 0.956 |
| Bayesian<br>network <sup>†</sup> | Default             | 3-4                     | 82.52    | 82.69       | 0.800       | 0.853     | 0.843   | 0.911 |
| MLP*                             | Default<br>1.12     | 3-4                     | 82.05    | 81.17       | 0.778       | 0.845     | 0.832   | 0.9   |
| MLP                              | 1.20                | 3-4                     | 82.11    | 0.795       | 0.847       | 0.837     | 0.815   | 0.908 |
| MLP                              | 1.10                | 3-4                     | 82.54    | 0.793       | 0.857       | 0.845     | 0.818   | 0.911 |
| MLP                              | 1.5                 | 3-4                     | 82.09    | 0.783       | 0.858       | 0.845     | 0.813   | 0.906 |
| MLP                              | 2.10.10             | 3-4                     | 82.07    | 0.794       | 0.847       | 0.836     | 0.815   | 0.901 |
| MLP                              | 2.20.20             | 3-4                     | 82.86    | 0.796       | 0.860       | 0.849     | 0.822   | 0.909 |
| MLP                              | 2.12.12             | 3-4                     | 82.71    | 0.804       | 0.850       | 0.841     | 0.822   | 0.902 |
| MLP                              | 2.5.5               | 3-4                     | 82.69    | 0.807       | 0.847       | 0.838     | 0.822   | 0.909 |
| MLP                              | 1.15                | 3-4                     | 81.97    | 0.752       | 0.887       | 0.867     | 0.805   | 0.906 |
| MLP                              | 2.15.15             | 3-4                     | 82.46    | 0.801       | 0.848       | 0.839     | 0.819   | 0.908 |
| MLP <sup>†</sup>                 | 2.12.12<br>Boosting | 3-4                     | 87.61    | 0.885       | 0.868       | 0.868     | 0.876   | 0.938 |
| Ensemble                         |                     | 3-4                     | 89.13    | 0.864       | 0.919       | 0.916     | 0.890   | 0.961 |

\* For MLPs, the default setting indicates the network structure suggested by the software. The numbers for MLP indicate the number of layers, the number of neurons in the hidden layer 1 and the number of neurons in the hidden layer 2.

<sup>†</sup> These models were used to develop ensemble models.

Table S14: Subgroup bias analysis

| Models                                              | Subgroup       | Accuracy | Sensitivity | Specificity | Precision | F score | FNR  | FPR  | AUC   |
|-----------------------------------------------------|----------------|----------|-------------|-------------|-----------|---------|------|------|-------|
| C5 Boosting<br>(Feature set 2,<br>Dataset 3)        | Male           | 90.82    | 0.967       | 0.893       | 0.696     | 0.809   | 0.03 | 0.11 | 0.974 |
|                                                     | Female         | 92.27    | 0.946       | 0.919       | 0.678     | 0.790   | 0.05 | 0.08 | 0.974 |
|                                                     | 0-20 years     | 93.33    | 1           | 0.926       | 0.600     | 0.750   | 0.00 | 0.07 | 1     |
|                                                     | 21-40<br>years | 96.88    | 1           | 0.967       | 0.630     | 0.773   | 0.00 | 0.03 | 0.992 |
|                                                     | 41-60<br>years | 94.71    | 0.912       | 0.952       | 0.705     | 0.795   | 0.09 | 0.05 | 0.976 |
|                                                     | 61-80<br>years | 87.22    | 0.955       | 0.844       | 0.674     | 0.790   | 0.04 | 0.16 | 0.962 |
|                                                     | 81+ years      | 85.06    | 1           | 0.747       | 0.733     | 0.846   | 0.00 | 0.25 | 0.954 |
| C 5 Boosting<br>(Feature set 1,<br>Dataset 3)       | Male           | 88.91    | 0.944       | 0.875       | 0.656     | 0.774   | 0.06 | 0.12 | 0.963 |
|                                                     | Female         | 93.10    | 0.953       | 0.927       | 0.703     | 0.809   | 0.05 | 0.07 | 0.979 |
|                                                     | 0-20 years     | 93.33    | 0.667       | 0.963       | 0.667     | 0.667   | 0.33 | 0.04 | 0.901 |
|                                                     | 21-40<br>years | 95.63    | 0.941       | 0.957       | 0.552     | 0.696   | 0.06 | 0.04 | 0.982 |
|                                                     | 41-60<br>years | 93.72    | 0.897       | 0.942       | 0.663     | 0.763   | 0.10 | 0.06 | 0.97  |
|                                                     | 61-80<br>years | 87.38    | 0.955       | 0.846       | 0.677     | 0.793   | 0.04 | 0.15 | 0.969 |
|                                                     | 81+ years      | 84.42    | 1           | 0.736       | 0.724     | 0.840   | 0.00 | 0.26 | 0.945 |
| SVM RBF<br>Default<br>(Feature set 3,<br>Dataset 3) | Male           | 89.81    | 0.856       | 0.909       | 0.703     | 0.772   | 0.14 | 0.09 | 0.952 |
|                                                     | Female         | 92.27    | 0.837       | 0.938       | 0.711     | 0.769   | 0.16 | 0.06 | 0.957 |
|                                                     | 0-20 years     | 100.0    | 1           | 1           | 1         | 1       | 0.00 | 0.00 | 1     |
|                                                     | 21-40<br>years | 96.25    | 1           | 0.960       | 0.586     | 0.739   | 0.00 | 0.04 | 0.994 |
|                                                     | 41-60<br>years | 92.56    | 0.779       | 0.944       | 0.639     | 0.702   | 0.22 | 0.06 | 0.94  |
|                                                     | 61-80<br>years | 89.00    | 0.872       | 0.896       | 0.739     | 0.800   | 0.13 | 0.10 | 0.941 |
|                                                     | 81+ years      | 80.52    | 0.810       | 0.802       | 0.739     | 0.773   | 0.19 | 0.20 | 0.912 |
| Ensemble 2<br>(Feature set 2,<br>Dataset 3)         | Male           | 86.23    | 0.883       | 0.857       | 0.609     | 0.721   | 0.12 | 0.14 | 0.95  |
|                                                     | Female         | 89.54    | 0.853       | 0.903       | 0.615     | 0.714   | 0.15 | 0.10 | 0.956 |
|                                                     | 0-20 years     | 93.33    | 0.667       | 0.963       | 0.667     | 0.667   | 0.33 | 0.04 | 0.926 |
|                                                     | 21-40<br>years | 95.63    | 0.882       | 0.960       | 0.556     | 0.682   | 0.12 | 0.04 | 0.986 |
|                                                     | 41-60<br>years | 91.07    | 0.765       | 0.929       | 0.578     | 0.658   | 0.24 | 0.07 | 0.949 |
|                                                     | 61-80<br>years | 83.98    | 0.904       | 0.818       | 0.627     | 0.740   | 0.10 | 0.18 | 0.941 |
|                                                     | 81+ years      | 73.38    | 0.905       | 0.615       | 0.620     | 0.735   | 0.10 | 0.38 | 0.905 |
